# Supplementary material for: Click chemistry-based imaging to study the tissue distribution of the curcumin–protein complex in mice
Source: Royal Society of Chemistry journal article supplement (doi:10.1039/c9fo02012h), 2020-01-01
Supplement: c9fo02012h1.pdf [file c9fo02012h1.pdf]

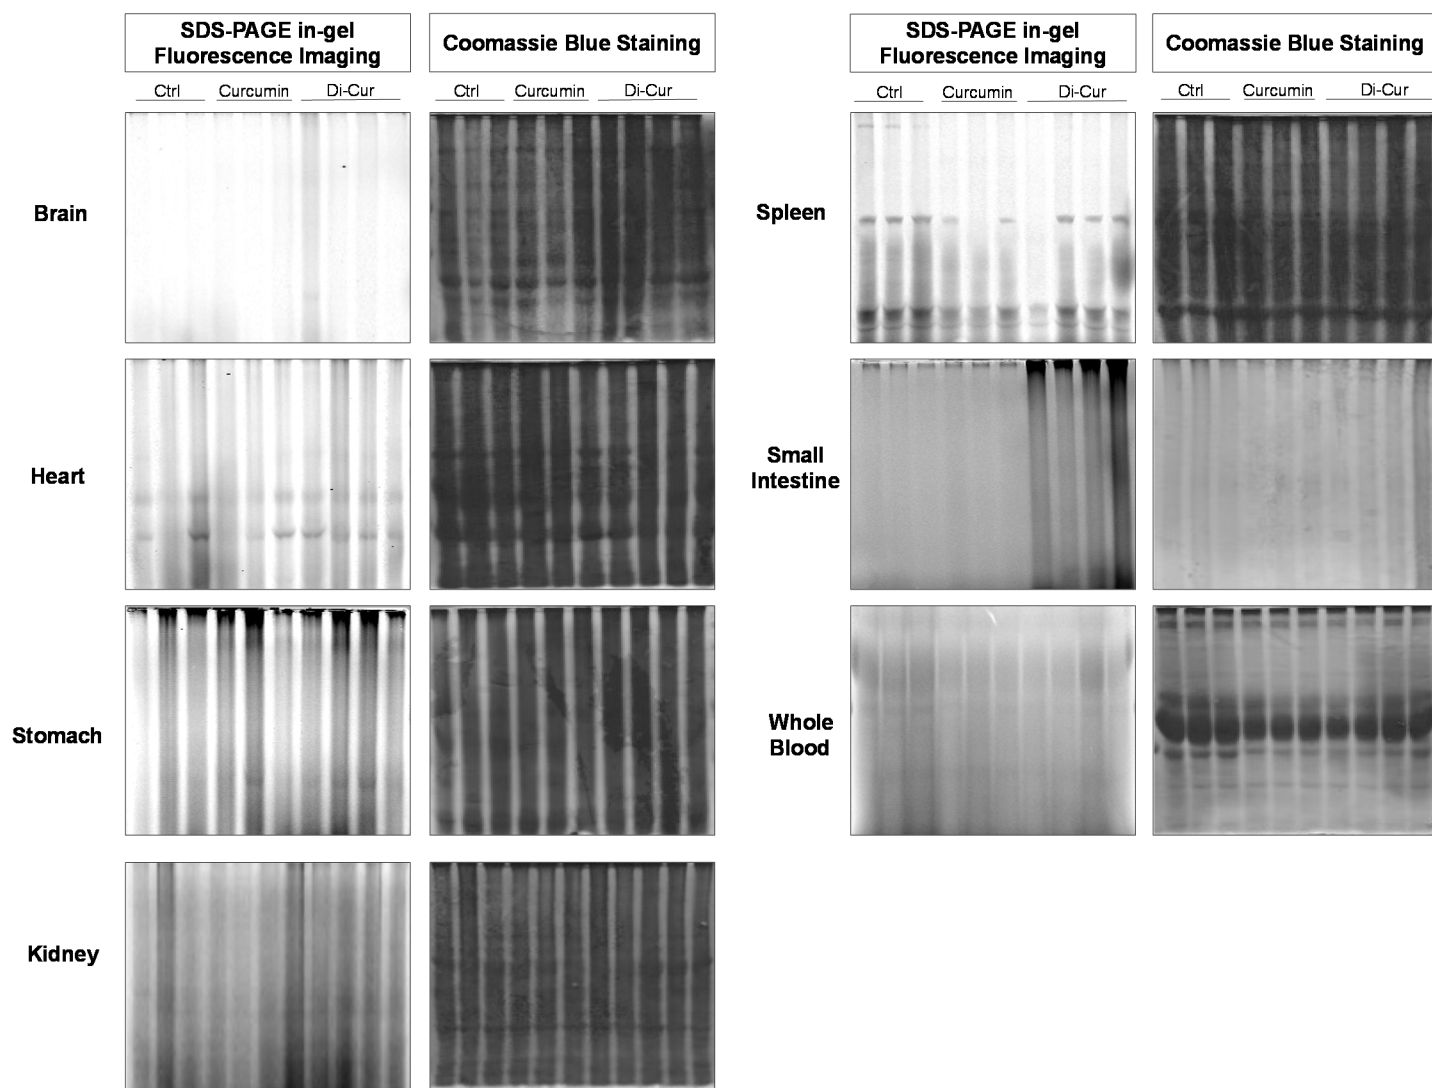

**Figure S1.** Effects of curcumin click-chemistry probe Di-Cur on labelling cellular proteins in tissues. Left panel: SDS-PAGE in-gel fluorescence. Right panel: Coomassie blue staining.
